# Supplementary material for: An entropy-driven signal-off DNA circuit for label-free, visual detection of small molecules with enhanced accuracy
Source: Royal Society of Chemistry journal article supplement (doi:10.1039/d1ay01939b), 2022-01-01
Supplement: d1ay01939b1.pdf [file d1ay01939b1.pdf]

Supporting Information For:

## **Entropy-driven signal-off DNA circuit for label-free, visual detection of small molecules with enhanced accuracy**

Tuqiang Li,<sup>1,2,#</sup> Yulan Wang,<sup>2,#</sup> Yanan Zhang,<sup>2</sup> Guobao Zhou<sup>2,\*</sup> and Lei Li<sup>2,\*</sup>

1 School of Petrochemical Engineering, Changzhou University, Changzhou 213016, China

2 Jiaxing Key Laboratory of Molecular Recognition and Sensing, College of Biological, Chemical  
Sciences and Engineering, Jiaxing University, Jiaxing 314001, China

Email: lei.li@mail.zjxu.edu.cn, gbzhou@mail.zjxu.edu.cn

Tel: (86) 573 83646203

## Contents

|                                                             |   |
|-------------------------------------------------------------|---|
| Table S1--DNA sequences.....                                | 3 |
| Scheme. S1.....                                             | 4 |
| Fig. S1.....                                                | 5 |
| Fig. S2.....                                                | 6 |
| Fig. S3.....                                                | 7 |
| Table S2--Recovery of ATP in fetal calf serum samples.....  | 8 |
| Table S3--Recovery of ATP in fetal calf serum samples ..... | 9 |

**Table S1.** DNA sequences used in this experiment

|                                     | DNA Sequence (5'-3')                                               |
|-------------------------------------|--------------------------------------------------------------------|
| DNA sequences used in ATP detection |                                                                    |
| ATP-aptamer                         | CGGCACCTGGGGGAGTATTGCGGAGGAAGGTGCCG                                |
| ATP-catalyst                        | CTTCCTCCGCAATACTCCCCA                                              |
| ATP-G1                              | CTTTCCTACACCTACGTCTCCAACCTAECTTACGGAGGG                            |
| ATP-G3                              | GGGTAGGGCGGGAAACCCTCTTCCTCCGCAATACT                                |
| ATP-G2a                             | CTTTCCTACACCTACGTCTCCAACCTAECTTACGGAGGGCGGGT                       |
| ATP-G2b                             | AGGGCGGGAAACCCTCTTCCTCCGCAATACT                                    |
| ATP-assistant                       | TGGGGGAGTATTGCGGAGGAAGAGGGCCGTAAGTTAGTTGGAGACG<br>TAGG             |
| ATP-fuel                            | CCTACGTCTCCAACCTAECTTACGGCCCTCTTCCTCCGCAATACT                      |
| On-A1 (Signal strand)               | CTTTCCTACACCTACGTCTCCAACCTAECTTACGGAAAA                            |
| On-A2                               | AAAAAAAAAAAAAAAAAACCCTCTTCCTCCGCAATACT                             |
| On-G1                               | CCGTAAGTTAGTAGGG                                                   |
| On-G3                               | GGGTAGGGCGGGAAATGGAGACGTAGG                                        |
| DNA sequences used in OTC detection |                                                                    |
| OTC-aptamer                         | CGACGCACA <del>GTCGCT</del> GGTGCGTACCTGGTTGCCGTTGTGT              |
| OTC-catalyst                        | CAACCAGGTACGCACC <del>AGCGAC</del>                                 |
| OTC-G1                              | TGGGGGTTTCACAGAATCTCCAACCTAECTTACGGAGGG                            |
| OTC-G3                              | GGGTAGGGCGGGAAACCCTCAACCAGGTACGCACC                                |
| OTC-assistant                       | <del>GTCGCT</del> GGTGCGTACCTGGTTGAGGGCCGTAAGTTAGTTGGAGATTC<br>TGT |
| OTC-fuel                            | ACAGAATCTCCAACCTAECTTACGGCCCTCAACCAGGTACGCACC                      |

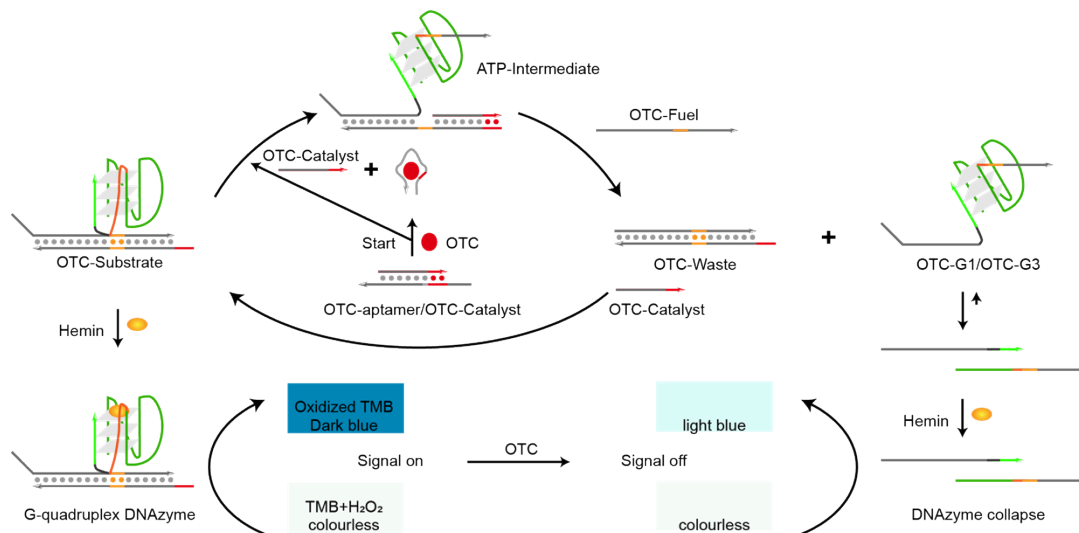

**Scheme S1.** Mechanism of the label-free, colorimetric detection of adenosine triphosphate (A) and oxytetracycline (B) based on the signal-off DNA circuit assay.

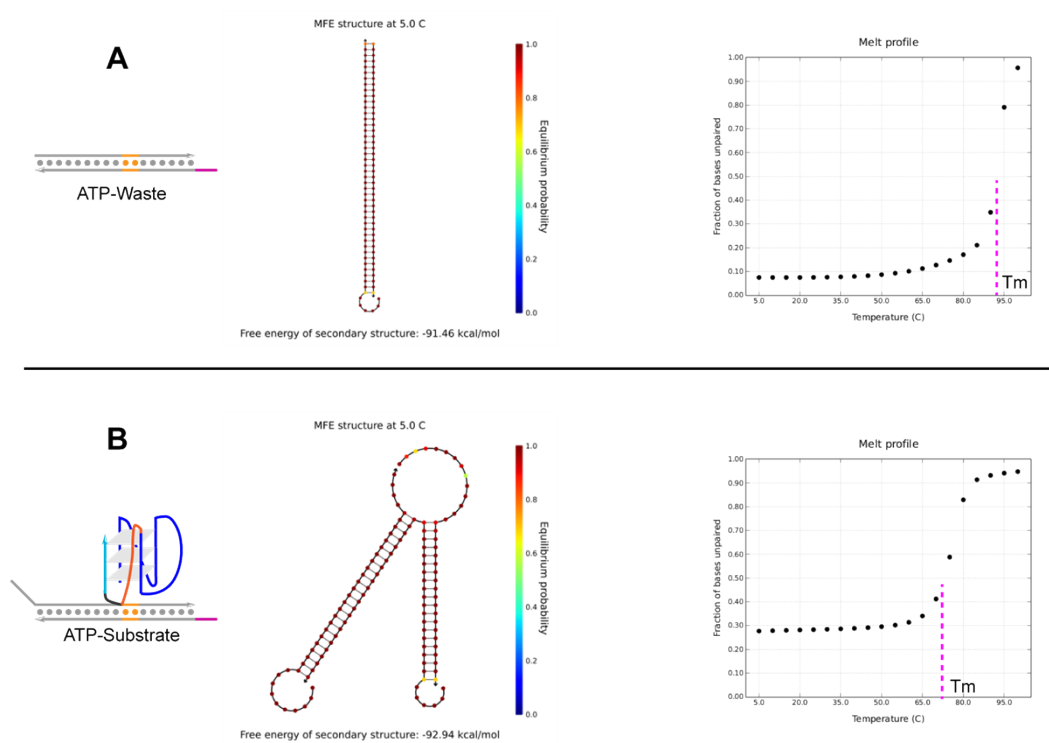

**Fig. S1** The free energy and melting temperature of ATP-Waste (A) and ATP-Substrate (B) complex was assessed via NUPACK at 25 °C.

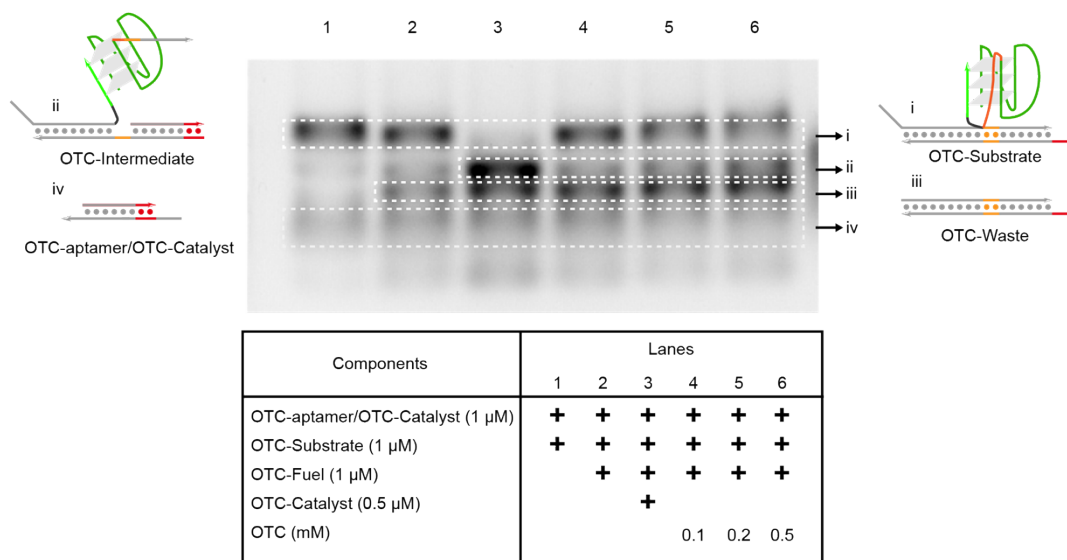

**Fig. S2** Analysis by AGE (2% agarose gel) of the entropy-driven DNA circuit mechanism (OTC detection assay). lane 1, OTC-aptamer/OTC-Catalyst + OTC-Substrate; lane 2, OTC-aptamer/OTC-Catalyst + OTC-Substrate + OTC-Fuel; lane 3, OTC-aptamer/OTC-Catalyst + OTC-Substrate + OTC-Fuel + OTC-Catalyst; lane 4, OTC-aptamer/OTC-Catalyst + OTC-Substrate + OTC-Fuel + 0.1 mM OTC; lane 5, OTC-aptamer/OTC-Catalyst + OTC-Substrate + OTC-Fuel + 0.2 mM OTC; and lane 6, OTC-aptamer/OTC-Catalyst + OTC-Substrate + OTC-Fuel + 0.5 mM OTC.

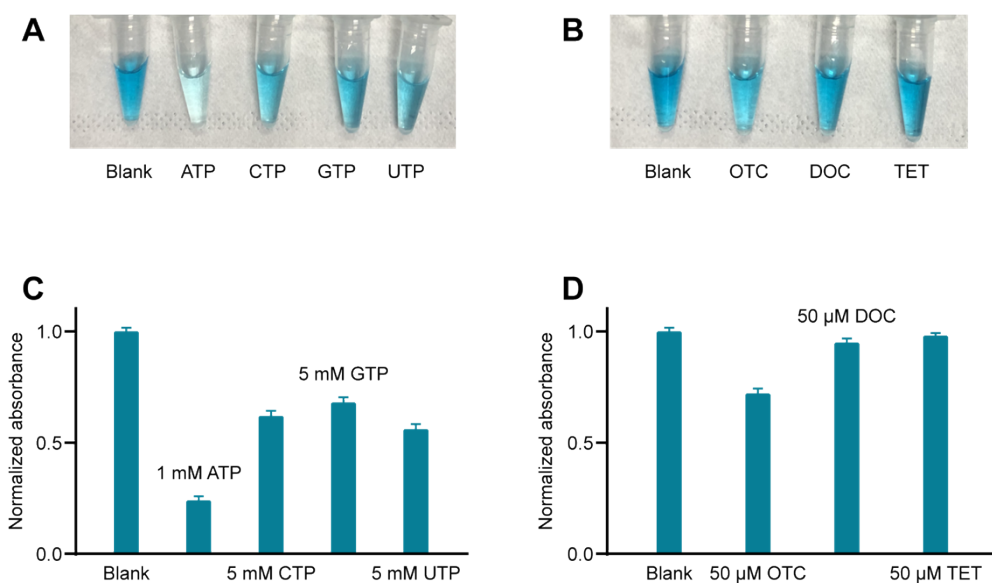

**Fig. S3** (A) Photographs of samples containing various ATP (1 mM) and its analogue (5 mM). (B) Absorbance of samples in A. (C) Photographs of samples containing various OTC (50  $\mu$ M) and its analogue (50  $\mu$ M). (D) Absorbance of samples in C.

**Table S2.** Recovery of ATP in fetal calf serum samples (n = 5)

| <b>Serum Sample</b> | <b>Added ATP<br/>(nM)</b> | <b>Found (nM)</b> | <b>Recovery(%)</b> | <b>RSD</b> |
|---------------------|---------------------------|-------------------|--------------------|------------|
| 1                   | 100                       | 104.7             | 104.7              | 5.8        |
| 2                   | 500                       | 487.1             | 97.4               | 6.1        |
| 3                   | 1000                      | 948.9             | 94.9               | 8.8        |
| 4                   | 5000                      | 5016.6            | 100.3              | 3.6        |



**Table S3.** Recovery of OTC in fetal calf serum samples (n = 5)

| <b>Serum Sample</b> | <b>Added ATP<br/>(nM)</b> | <b>Found (nM)</b> | <b>Recovery(%)</b> | <b>RSD</b> |
|---------------------|---------------------------|-------------------|--------------------|------------|
| 1                   | 500                       | 498.3             | 99.7               | 4.3        |
| 2                   | 1000                      | 1034.2            | 103.4              | 5.4        |
| 3                   | 2000                      | 1845.2            | 92.3               | 5.6        |
| 4                   | 5000                      | 4785.9            | 95.7               | 9.2        |
